# Supplementary material for: Educational Intervention to Decrease Justification of Adolescent Dating Violence: A Comparative Quasi-Experimental Study
Source: Healthcare (Basel). 2023 Apr 18;11(8):1156. doi: 10.3390/healthcare11081156 (PMC10138385; doi:10.3390/healthcare11081156)

## SUPPLEMENTARY MATERIAL

**Figure S1.** The extent to which all the participants justify physical violence as a means of conflict resolution, based on the AADS test.

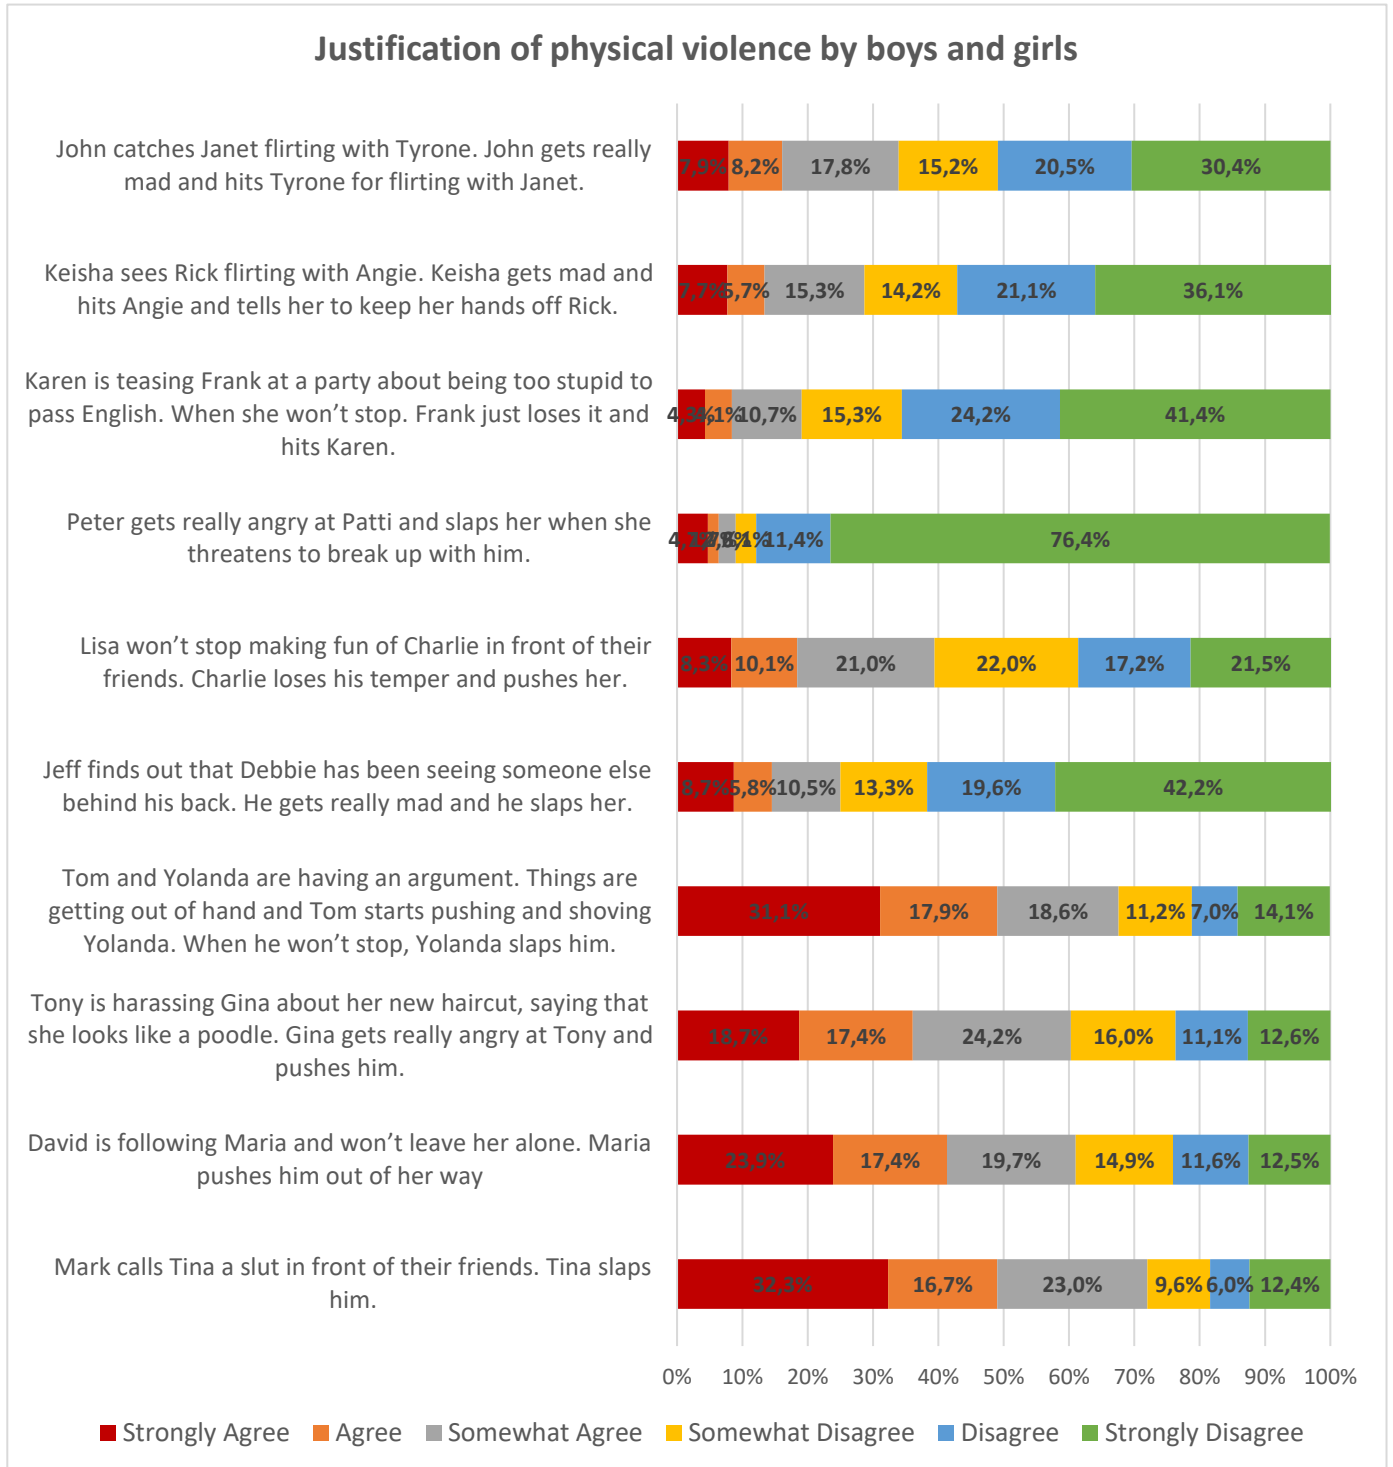

**Table S1.** The extent to which girls justify female psychological violence against partners, based on the JVCT test.

|                                                                             | Level of justification |                       |        |               |               |
|-----------------------------------------------------------------------------|------------------------|-----------------------|--------|---------------|---------------|
|                                                                             | Never                  | In extreme situations | Rarely | In some cases | In many cases |
| Insulting or threatening the boyfriend/girlfriend.                          | 76,8%                  | 12,1%                 | 4,3%   | 4,3%          | 2,5%          |
| Being grumpy when talking about a subject.                                  | 16,0%                  | 21,3%                 | 30,5%  | 22,8%         | 9,4%          |
| Suddenly leaving the room, house or place of the discussion                 | 22,0%                  | 26,5%                 | 21,7%  | 14,1%         | 15,7%         |
| Doing or saying something to upset the boyfriend/girlfriend.                | 65,5%                  | 12,9%                 | 11,2%  | 6,9%          | 3,6%          |
| Do not let the boyfriend/girlfriend see or talk to your family.             | 87,4%                  | 4,8%                  | 4,0%   | 2,0%          | 1,8%          |
| Turn the boyfriend/girlfriend's family or friends against him/her.          | 89,4%                  | 4,8%                  | 2,8%   | 1,3%          | 1,8%          |
| Don't let your boyfriend/girlfriend do things to be with you.               | 70,0%                  | 13,2%                 | 8,4%   | 4,8%          | 3,6%          |
| Interfering in the relationship with family members.                        | 76,0%                  | 13,0%                 | 4,3%   | 3,6%          | 3,1%          |
| Being jealous of their friends and suspicious of them.                      | 40,1%                  | 28,9%                 | 16,8%  | 7,9%          | 6,3%          |
| Becoming jealous of other boys/girls                                        | 32,0%                  | 26,1%                 | 18,3%  | 12,7%         | 10,9%         |
| Check what he/she does and demand to know where he/she has been.            | 75,9%                  | 10,7%                 | 4,1%   | 5,6%          | 3,8%          |
| Accusing the boyfriend/girlfriend of going out with another boy/girlfriend. | 57,1%                  | 24,1%                 | 8,6%   | 5,1%          | 5,1%          |

**Table S2.** The extent to which boys justify female psychological violence against partners, based on the JVCT test.

|                                                                             | Level of justification |                       |        |               |               |
|-----------------------------------------------------------------------------|------------------------|-----------------------|--------|---------------|---------------|
|                                                                             | Never                  | In extreme situations | Rarely | In some cases | In many cases |
| Insulting or threatening the boyfriend/girlfriend.                          | 74,2%                  | 12,9%                 | 7,7%   | 2,6%          | 2,6%          |
| Being grumpy when talking about a subject.                                  | 21,9%                  | 17,1%                 | 24,5%  | 23,3%         | 13,3%         |
| Suddenly leaving the room, house or place of the discussion                 | 22,4%                  | 24,7%                 | 21,4%  | 18,4%         | 13,2%         |
| Doing or saying something to upset the boyfriend/girlfriend.                | 61,8%                  | 16,4%                 | 11,2%  | 5,4%          | 5,2%          |
| Do not let the boyfriend/girlfriend see or talk to your family.             | 85,2%                  | 5,6%                  | 3,7%   | 1,6%          | 3,7%          |
| Turn the boyfriend/girlfriend's family or friends against him/her.          | 82,2%                  | 9,9%                  | 3,3%   | 1,6%          | 3,1%          |
| Don't let your boyfriend/girlfriend do things to be with you.               | 63,7%                  | 17,5%                 | 10,6%  | 3,5%          | 4,7%          |
| Interfering in the relationship with family members.                        | 70,1%                  | 14,6%                 | 8,9%   | 2,8%          | 3,5%          |
| Being jealous of their friends and suspicious of them.                      | 43,8%                  | 26,9%                 | 13,1%  | 8,9%          | 7,3%          |
| Becoming jealous of other boys/girls                                        | 35,0%                  | 24,2%                 | 19,0%  | 12,4%         | 9,4%          |
| Check what he/she does and demand to know where he/she has been.            | 67,1%                  | 15,3%                 | 7,3%   | 6,8%          | 3,5%          |
| Accusing the boyfriend/girlfriend of going out with another boy/girlfriend. | 52,2%                  | 23,8%                 | 11,8%  | 5,9%          | 6,4%          |

**Table S3.** The extent to which girls justify male psychological violence against partners, based on the JVCT test.

|                                                                             | Level of justification |                       |        |               |               |
|-----------------------------------------------------------------------------|------------------------|-----------------------|--------|---------------|---------------|
|                                                                             | Never                  | In extreme situations | Rarely | In some cases | In many cases |
| Insulting or threatening the boyfriend/girlfriend.                          | 79,2%                  | 9,9%                  | 4,2%   | 3,5%          | 3,2%          |
| Being grumpy when talking about a subject.                                  | 15,7%                  | 22,1%                 | 28,9%  | 23,4%         | 9,9%          |
| Suddenly leaving the room, house or place of the discussion                 | 20,9%                  | 27,7%                 | 22,9%  | 13,0%         | 15,5%         |
| Doing or saying something to upset the boyfriend/girlfriend.                | 66,3%                  | 13,3%                 | 10,5%  | 6,4%          | 3,6%          |
| Do not let the boyfriend/girlfriend see or talk to your family.             | 86,5%                  | 5,1%                  | 3,8%   | 2,3%          | 2,3%          |
| Turn the boyfriend/girlfriend's family or friends against him/her.          | 87,5%                  | 4,6%                  | 3,8%   | 2,3%          | 1,8%          |
| Don't let your boyfriend/girlfriend do things to be with you.               | 69,8%                  | 12,5%                 | 8,2%   | 5,4%          | 4,1%          |
| Interfering in the relationship with family members.                        | 73,6%                  | 13,1%                 | 6,7%   | 3,1%          | 3,6%          |
| Being jealous of their friends and suspicious of them.                      | 40,1%                  | 29,1%                 | 15,8%  | 7,7%          | 7,4%          |
| Becoming jealous of other boys/girls                                        | 30,4%                  | 26,8%                 | 18,6%  | 11,7%         | 12,5%         |
| Check what he/she does and demand to know where he/she has been.            | 74,7%                  | 9,0%                  | 4,6%   | 5,6%          | 6,1%          |
| Accusing the boyfriend/girlfriend of going out with another boy/girlfriend. | 55,2%                  | 24,3%                 | 9,5%   | 5,6%          | 5,4%          |

**Table S4.** The extent to which boys justify male psychological violence against partners, based on the JVCT test.

|                                                                             | Level of justification |                       |        |               |               |
|-----------------------------------------------------------------------------|------------------------|-----------------------|--------|---------------|---------------|
|                                                                             | Never                  | In extreme situations | Rarely | In some cases | In many cases |
| Insulting or threatening the boyfriend/girlfriend.                          | 75,0%                  | 12,7%                 | 5,6%   | 3,6%          | 3,1%          |
| Being grumpy when talking about a subject.                                  | 23,6%                  | 16,1%                 | 26,4%  | 22,2%         | 11,7%         |
| Suddenly leaving the room, house or place of the discussion                 | 24,1%                  | 23,7%                 | 21,8%  | 19,0%         | 11,4%         |
| Doing or saying something to upset the boyfriend/girlfriend.                | 62,8%                  | 16,2%                 | 10,9%  | 5,8%          | 4,4%          |
| Do not let the boyfriend/girlfriend see or talk to your family.             | 83,4%                  | 6,2%                  | 5,1%   | 2,1%          | 3,2%          |
| Turn the boyfriend/girlfriend's family or friends against him/her.          | 82,2%                  | 9,2%                  | 4,4%   | 1,6%          | 2,5%          |
| Don't let your boyfriend/girlfriend do things to be with you.               | 64,4%                  | 16,9%                 | 11,1%  | 4,2%          | 3,5%          |
| Interfering in the relationship with family members.                        | 69,4%                  | 14,1%                 | 11,1%  | 3,0%          | 2,5%          |
| Being jealous of their friends and suspicious of them.                      | 44,0%                  | 28,8%                 | 12,9%  | 8,1%          | 6,2%          |
| Becoming jealous of other boys/girls                                        | 35,3%                  | 25,6%                 | 19,1%  | 10,8%         | 9,2%          |
| Check what he/she does and demand to know where he/she has been.            | 66,7%                  | 14,3%                 | 8,1%   | 6,9%          | 3,9%          |
| Accusing the boyfriend/girlfriend of going out with another boy/girlfriend. | 51,8%                  | 24,2%                 | 10,1%  | 7,4%          | 6,5%          |

**Figure S2.** Analysis of the changes on physical violence, based on the AADS dimensions, after the educational intervention. Statistical analyses were performed through a Wilcoxon test. Box plots depict 5th (lower edge) and 95th (upper edge) percentiles and median (horizontal bar).

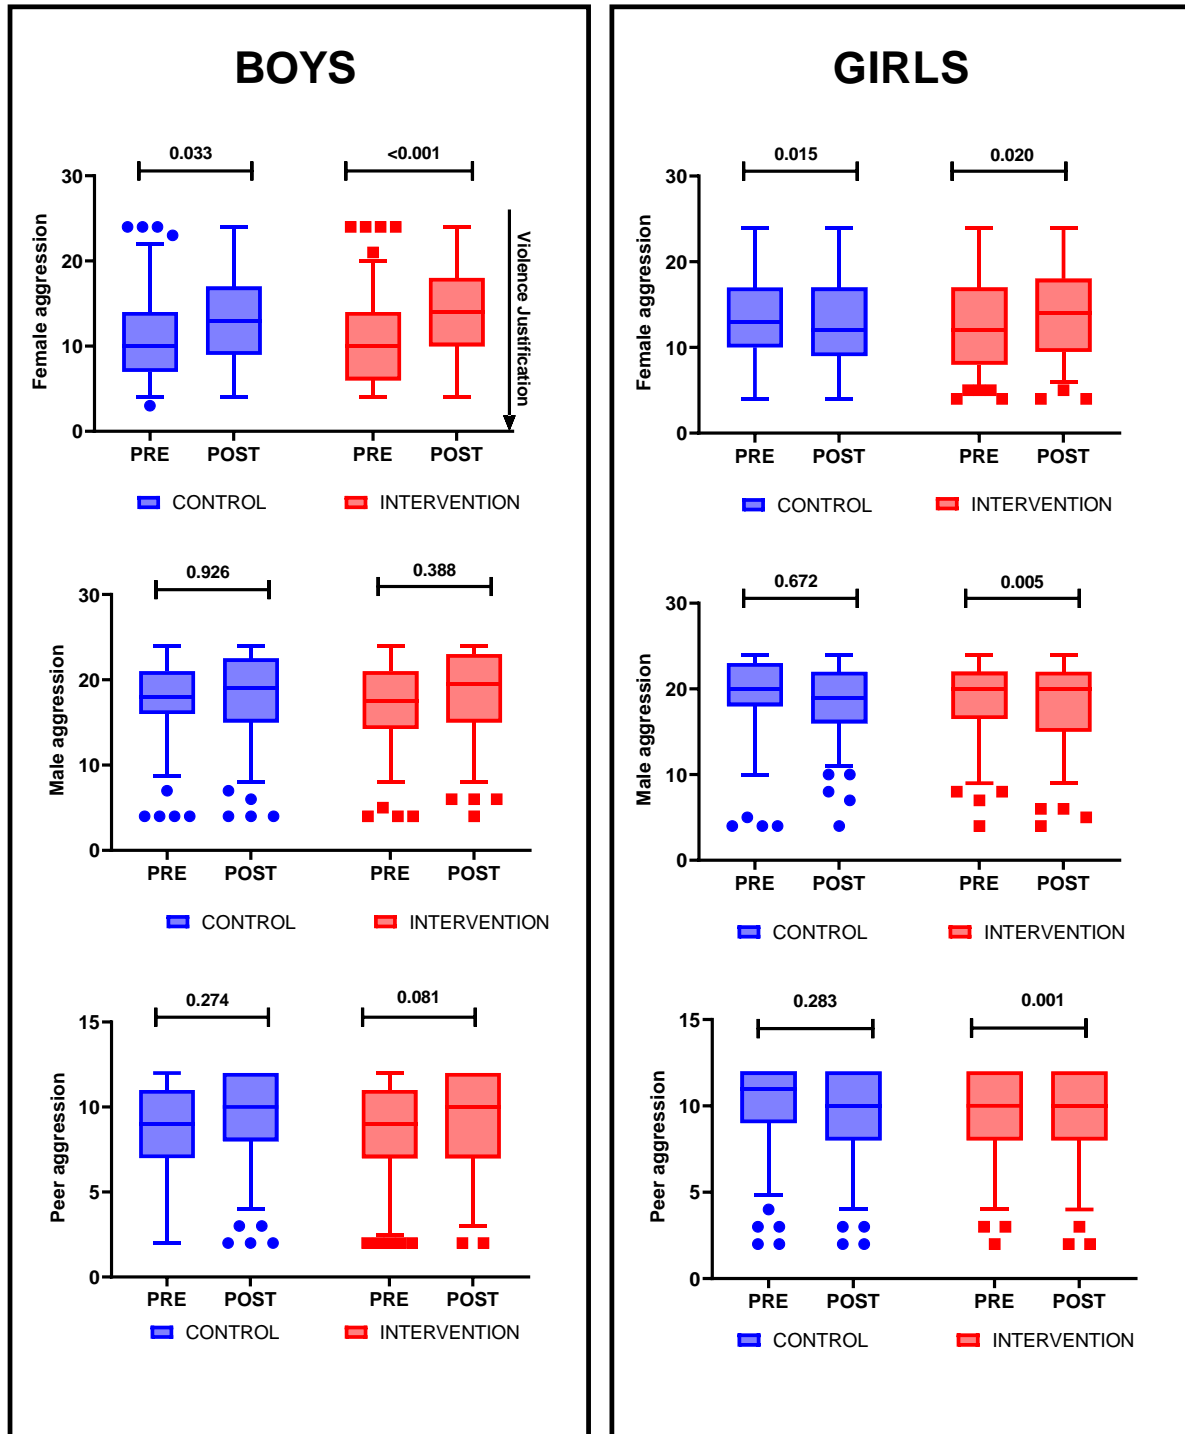

**Figure S3.** Analysis of the changes on psychological violence, based on the JVCT dimensions, after the educational intervention in the boys group. Statistical analyses were performed through a Wilcoxon test. Box plots depict 5th (lower edge) and 95th (upper edge) percentiles and median (horizontal bar).

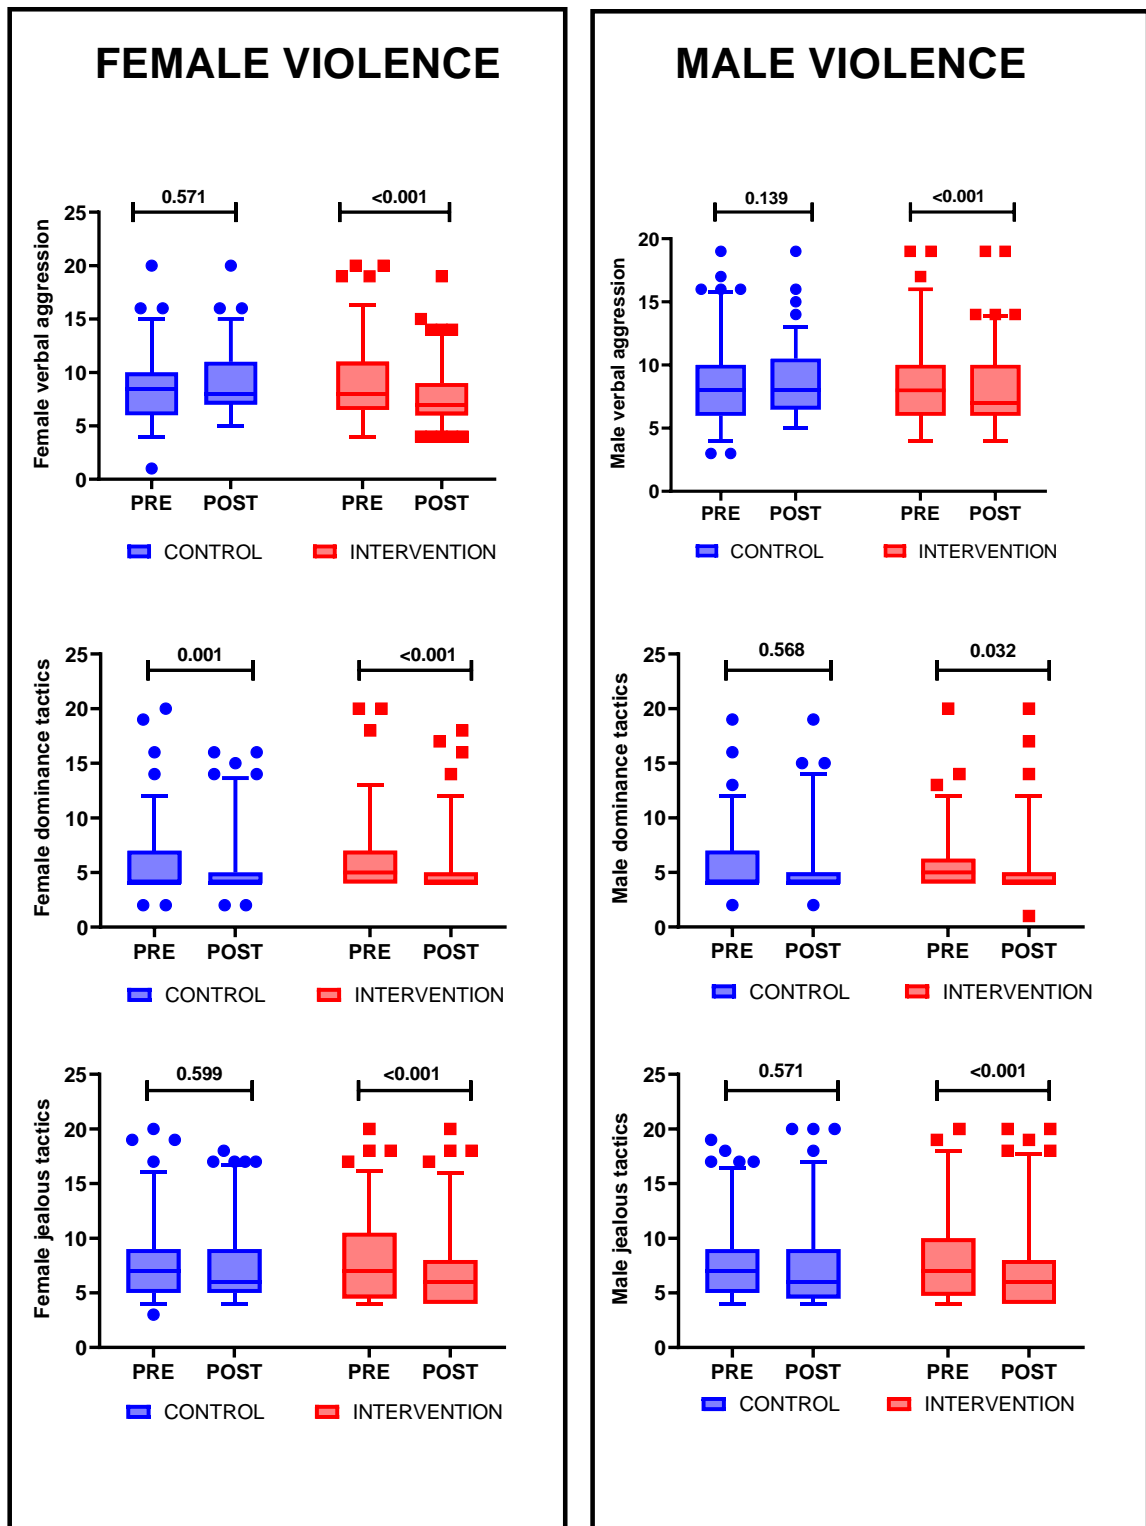

**Figure S4.** Analysis of the changes on psychological violence, based on the JVCT dimensions, after the educational intervention in the girls group. Statistical analyses were performed through a Wilcoxon test. Box plots depict 5th (lower edge) and 95th (upper edge) percentiles and median (horizontal bar).

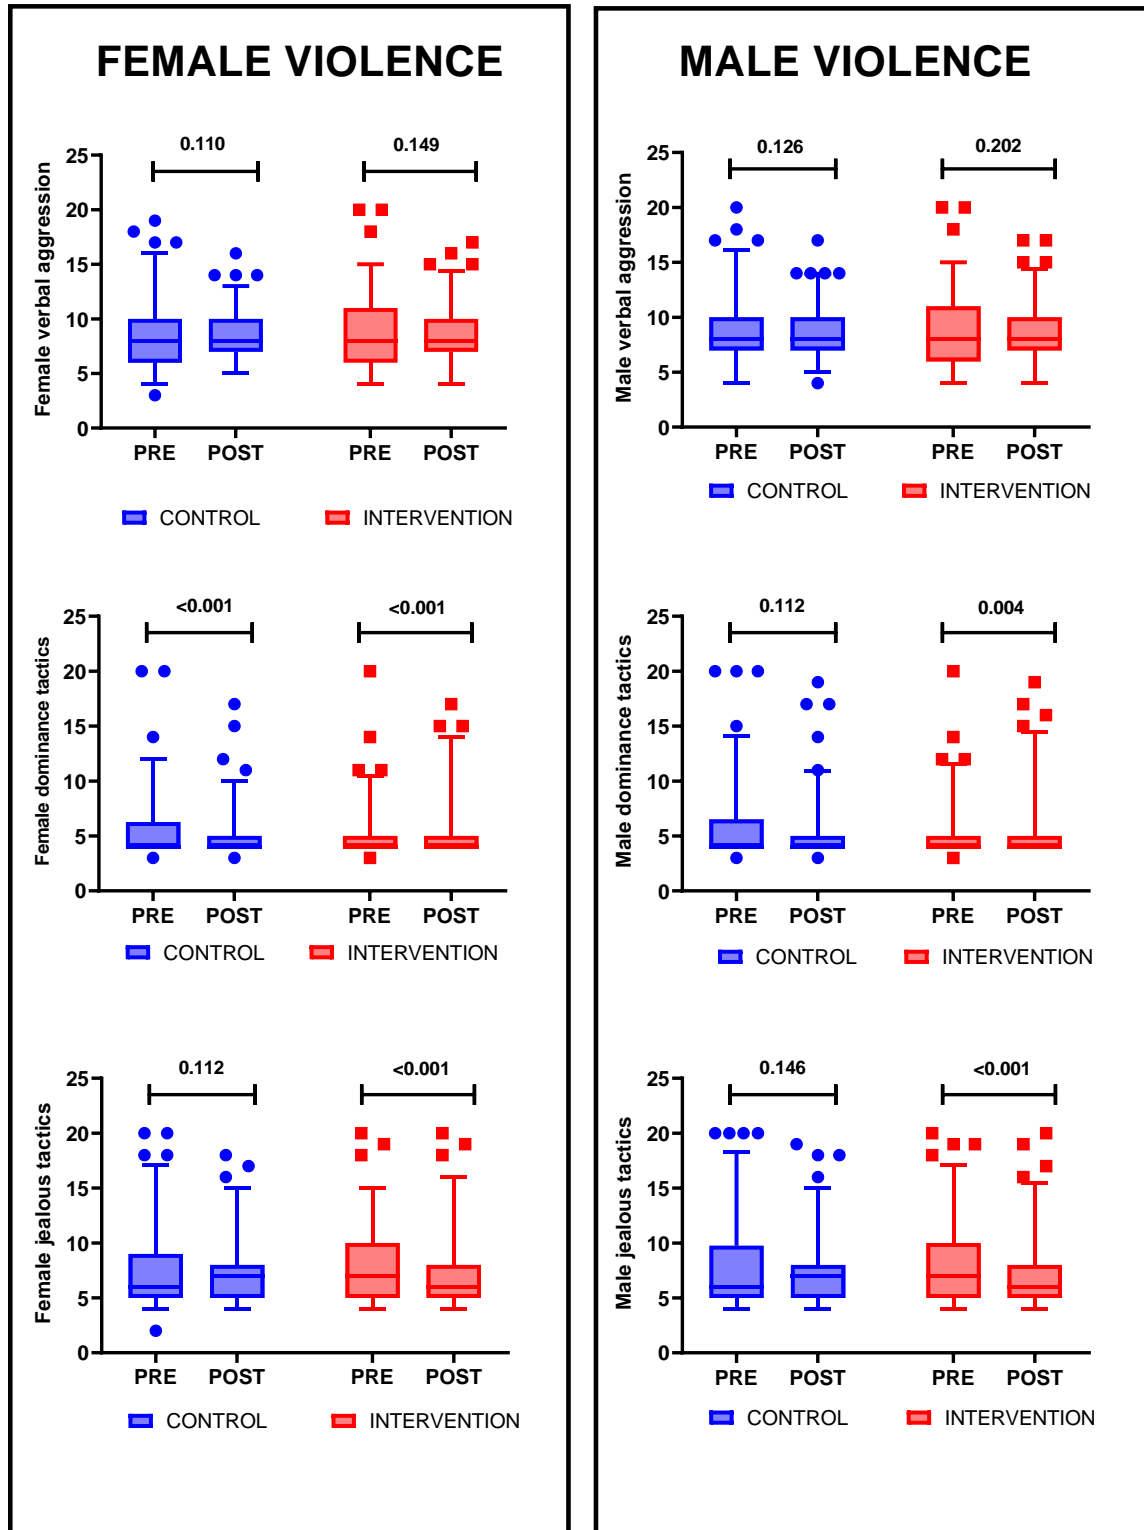

Supplement: Supplementary file 1 [file healthcare-11-01156-s001.zip › healthcare-2289014-supplementary.pdf]
